# Supplementary material
Source: publisher site journal article supplement (https://static.cambridge.org/content/id/urn:cambridge.org:id:article:S0022112015002876/resource/name/FLM1500287supp.zip)
Supplement: Supplementary file 1 [file FLM1500287supp.zip]

## SUPPLEMENTAL INFORMATION

GROWTH-AND-COLLAPSE DYNAMICS OF  
SMALL BUBBLE CLUSTERS NEAR A WALL

A. Tiwari, C. Pantano and J. B. Freund

---

| Arrangement A |           |           | Arrangement B |           |           |
|---------------|-----------|-----------|---------------|-----------|-----------|
| $x$ (mm)      | $y$ (mm)  | $z$ (mm)  | $x$ (mm)      | $y$ (mm)  | $z$ (mm)  |
| -1.086836     | 0.689173  | -1.024553 | -1.025854     | 0.597152  | 0.292199  |
| -2.367571     | -1.281840 | 3.589808  | -3.329176     | 1.136410  | 0.460673  |
| -3.661258     | -4.868838 | -1.622075 | -4.867184     | 1.138743  | -3.848681 |
| -1.931421     | -0.985416 | 5.652233  | -1.042292     | 0.325168  | 3.967223  |
| -4.785294     | 0.636287  | 0.064156  | -1.768032     | -5.631457 | -0.640963 |
| -1.885370     | -2.381264 | -0.481226 | -5.355006     | 1.188808  | 0.856156  |
| -1.110226     | -2.291957 | -4.706053 | -3.051651     | 1.713072  | 3.918957  |
| -2.209516     | 1.014170  | 5.394270  | -3.243492     | -4.163419 | -1.433412 |
| -1.372657     | -4.929850 | 0.851532  | -2.309864     | 1.329732  | -1.573699 |
| -5.314615     | 0.642289  | -3.438534 | -2.680362     | 2.169451  | -3.470404 |
| -2.736749     | 4.039751  | -2.467888 | -4.113917     | -0.864378 | -1.441598 |
| -1.134484     | 0.804616  | -4.338246 | -2.773029     | -4.955946 | 2.133865  |
| -3.444904     | 0.332877  | -2.691925 | -1.682376     | -1.286627 | 1.008094  |
| -1.488035     | 1.662933  | 2.789523  | -3.136402     | -3.103409 | 2.922667  |
| -5.299482     | -1.089539 | 1.179641  | -4.375106     | 3.520721  | -1.334330 |
| -1.298281     | -0.877510 | 1.085704  | -1.425108     | 4.296104  | -3.444544 |
| -4.043875     | -1.597892 | -1.050671 | -3.286204     | -3.468501 | -3.779071 |
| -4.352587     | 2.238476  | 1.945842  | -2.758607     | -0.821597 | 5.554301  |
| -1.178886     | -3.861257 | -2.243984 | -1.147344     | 3.561551  | 1.141706  |
| -5.882439     | 0.485350  | 2.388231  | -1.423824     | -4.998291 | -3.671132 |
| -1.447131     | -4.591041 | 3.242370  | -5.417658     | 0.700687  | -1.671082 |
| -3.336262     | -1.041263 | 0.755701  | -2.500932     | -1.313393 | -4.965392 |
| -4.511158     | -1.673325 | 4.156348  | -1.096053     | 2.602783  | 4.620531  |
| -4.208337     | 2.480724  | -2.880547 | -2.311438     | 5.442386  | -1.556710 |
| -2.173839     | 3.744195  | 3.606787  | -3.029472     | -1.423919 | -3.028656 |
| -2.623093     | 2.132962  | 0.497280  | -1.657068     | -2.790654 | -2.098797 |
| -3.637898     | 5.094763  | 0.666160  | -3.932265     | -2.747164 | 1.018104  |
| -1.959615     | 5.813372  | -0.774004 | -5.017970     | -0.623531 | 2.542517  |
| -3.218766     | -2.630871 | -3.474723 | -1.903634     | 0.923346  | -5.441145 |
| -3.946817     | 1.222129  | 3.932966  | -1.347166     | -3.085465 | -5.311293 |
| -3.369430     | -0.774688 | -5.207717 | -1.151900     | -3.991158 | 4.717736  |
| -2.503334     | 2.055689  | -1.703054 | -1.523446     | 5.960278  | 0.869485  |
| -4.134656     | -3.297280 | 1.934555  | -2.313194     | 3.817550  | 3.022540  |
| -1.755276     | -3.065508 | 4.693913  | -1.670914     | 1.659796  | 1.921853  |
| -1.440827     | 3.953303  | -0.253241 | -2.778200     | -0.383989 | 3.195630  |
| -5.764873     | 2.469881  | -0.308948 | -3.623605     | 5.116382  | 1.059723  |
| -5.254612     | -2.930658 | -0.009048 | -5.216182     | -2.199783 | -2.591223 |
| -1.047282     | -1.127636 | -2.707068 | -1.610142     | -3.648347 | -0.215130 |
| -1.277922     | 2.775056  | -3.948091 | -5.559343     | -0.982882 | 0.229753  |
| -5.004160     | -1.782155 | -2.831330 | -4.711215     | 3.595206  | 2.173660  |
| -3.582637     | 1.453562  | -4.539342 | -1.196679     | -2.268830 | 3.281457  |
| -1.812641     | 5.006654  | 1.954683  | -1.175062     | 2.779312  | -0.742784 |
| -6.196743     | -1.037085 | -0.714041 | -1.837841     | 3.089366  | -5.112517 |
| -1.348730     | -5.881095 | -1.883898 | -4.101476     | -1.985212 | 4.281609  |
| -1.725683     | -2.597173 | 2.073078  | -1.036527     | 0.048177  | -3.474658 |
| -2.299649     | -4.490142 | -3.801999 | -1.134382     | 0.897094  | 6.175811  |
| -3.016148     | -5.161372 | 2.062628  | -1.394477     | -0.783256 | -1.164002 |
| -4.421427     | 4.254605  | -1.408623 | -4.512662     | 0.166093  | 4.380083  |
| -1.259840     | 2.828885  | 5.376202  | -3.081793     | 3.235950  | 0.284282  |
| -1.231422     | 5.143116  | -3.478384 | -1.099171     | -3.817647 | 1.913919  |

---

TABLE 1. Initial bubble-center coordinates for arrangements A and B. The first row is the centermost bubble.

---

---

| ARRANGEMENT C |           |           | ARRANGEMENT D |           |           |
|---------------|-----------|-----------|---------------|-----------|-----------|
| $x$ (mm)      | $y$ (mm)  | $z$ (mm)  | $x$ (mm)      | $y$ (mm)  | $z$ (mm)  |
| -1.130368     | -1.910057 | -0.486667 | -1            | 0         | 0         |
| -1.347649     | 3.135913  | 1.577115  | -3.770163     | 2.782929  | 3.301894  |
| -4.073435     | -2.970037 | -3.129806 | -1.816968     | -3.287415 | -0.818264 |
| -4.206148     | -2.05289  | 1.623391  | -2.160684     | 3.221941  | -4.070333 |
| -2.791085     | 2.985814  | 4.378397  | -2.072842     | 5.591209  | -0.076946 |
| -4.091234     | -4.167095 | 0.022036  | -5.151546     | -0.164242 | 1.677156  |
| -1.843576     | -3.642795 | -3.679984 | -4.112765     | 0.196562  | 4.588827  |
| -1.02021      | 3.530931  | -2.487378 | -3.48674      | -2.180443 | -3.597929 |
| -3.363791     | 0.920097  | 5.088021  | -1.370899     | 0.976201  | 1.846254  |
| -2.030365     | 1.212903  | 0.131671  | -1.013796     | -2.172574 | 2.763817  |
| -1.617247     | -1.821466 | -5.206256 | -4.555793     | 0.740665  | -2.533894 |
| -4.36183      | 1.950946  | -0.855566 | -4.38403      | -2.395818 | 0.045017  |
| -3.039747     | 5.244462  | 1.800337  | -4.266423     | -3.973894 | 2.058329  |
| -3.477591     | 1.489394  | 2.750792  | -1.164026     | 0.528961  | -4.732485 |
| -3.552663     | 3.505682  | -2.107119 | -1.577105     | 2.800156  | 4.492982  |
| -3.109569     | -1.40564  | -0.91744  | -2.485581     | -5.580425 | -0.56538  |
| -4.004739     | 3.238728  | 1.309843  | -2.823444     | -0.807526 | 3.363698  |
| -1.911987     | -0.261233 | 5.880163  | -2.453068     | 4.8622    | -2.680419 |
| -2.559489     | 2.660687  | -4.419231 | -2.880426     | 2.638363  | 1.197471  |
| -3.019674     | -1.44596  | 4.47351   | -4.509964     | 0.313179  | -0.344368 |
| -1.377028     | -6.102921 | 1.098594  | -2.149291     | -5.105893 | 2.012321  |
| -5.409609     | -2.585645 | -1.315683 | -5.745151     | 1.843236  | 1.361308  |
| -2.186253     | -4.678207 | -1.155613 | -5.30023      | 2.861373  | -1.561469 |
| -1.59763      | 1.237553  | -3.267804 | -4.021656     | -3.707002 | -2.018681 |
| -3.067227     | 5.329914  | -1.110111 | -1.654673     | 1.445427  | -1.376871 |
| -3.671746     | -1.855537 | -4.813492 | -3.101309     | -1.148259 | -1.770143 |
| -5.505486     | -0.487748 | 1.543838  | -1.655912     | -2.352541 | 5.547409  |
| -4.376676     | 1.040072  | -2.667119 | -1.918109     | -2.882758 | -4.958871 |
| -2.374447     | -0.281567 | 1.917868  | -3.314458     | 2.770071  | -2.499606 |
| -1.608859     | -3.15239  | 2.064554  | -1.967469     | 3.510754  | -0.535955 |
| -2.449094     | -0.029131 | -5.810105 | -5.801057     | -0.735306 | -1.829286 |
| -1.018234     | 1.903903  | 4.367739  | -3.535317     | 0.635861  | -5.05586  |
| -1.682823     | -0.849756 | -2.846931 | -3.993399     | 4.3966    | 0.568537  |
| -2.872308     | -4.250072 | 3.539808  | -1.471964     | 4.994376  | 2.000992  |
| -4.778905     | 1.315446  | 1.009819  | -4.876605     | -1.878476 | 2.895856  |
| -1.336113     | 5.934479  | 0.08659   | -1.336831     | -3.051758 | -2.868963 |
| -5.618893     | -0.527509 | -2.64073  | -2.194793     | 0.018213  | 5.515432  |
| -1.231284     | 4.208949  | 3.67896   | -1.721576     | -1.877785 | 0.912429  |
| -1.795983     | -3.056592 | 4.880163  | -2.344592     | -3.938302 | 4.213601  |
| -4.78655      | 0.110611  | 3.627322  | -1.249123     | -5.665761 | -2.183312 |
| -1.064543     | 5.826269  | -2.317829 | -1.116183     | -1.177279 | -2.109067 |
| -6.120206     | 0.919675  | -1.213525 | -3.396233     | 0.825787  | 2.258398  |
| -2.205835     | 3.325946  | -0.343311 | -1.697907     | -0.953892 | -5.979286 |
| -4.297979     | 0.165881  | -4.659545 | -2.679911     | -4.350528 | -3.58751  |
| -4.991222     | 3.889489  | -0.712188 | -1.100715     | 2.985462  | 2.398344  |
| -1.132703     | 1.620906  | -5.583066 | -2.478454     | 1.078754  | -3.238127 |
| -1.37744      | -0.299841 | 3.867377  | -4.376056     | -4.559731 | 0.000507  |
| -1.05571      | -5.251221 | 3.14409   | -6.279886     | -1.032838 | 0.106307  |
| -1.502661     | 4.576558  | -4.135646 | -1.055093     | 2.543551  | -5.636118 |
| -5.288251     | -0.740037 | -0.453074 | -1.020784     | 0.906766  | 3.817916  |

---

TABLE 2. Initial bubble-center coordinates for arrangements C and D. The first row is the centermost bubble.

---
